# Supplementary material for: Another Move towards Bicalutamide Dissolution and Permeability Improvement with Acetylated β-Cyclodextrin Solid Dispersion
Source: MDPI journal article supplement (doi:10.3390/pharmaceutics14071472), 2022-07-15
Supplement: s1 [file s1]

# Another move towards bicalutamide dissolution and permeability improvement with acetylated $\beta$ -cyclodextrin solid dispersion

Tatyana V. Volkova, Olga R. Simonova, German L. Perlovich\*

*G.A. Krestov Institute of Solution Chemistry RAS, 153045 Ivanovo, Russia*

*\*Correspondence: glp@isc-ras.ru*

Supporting Information - content:

|                                                                                                                                                                                                                                                                                |    |
|--------------------------------------------------------------------------------------------------------------------------------------------------------------------------------------------------------------------------------------------------------------------------------|----|
| <b>Figure S1.</b> The absorption spectra of BCL in pure buffer pH 6.8 (blue), Me- $\beta$ -CD (orange), Ac- $\beta$ -CD (red), n-hexane (green); ethanol (wine).                                                                                                               | P2 |
| <b>Figure S2.</b> PXRD patterns of BCL raw (a), BCL after solubility experiments with Me- $\beta$ - (b) and Ac- $\beta$ - (c) cyclodextrins in pH 6.8 solutions.                                                                                                               | P3 |
| <b>Figure S3.</b> The temperature dependences of the stability constants for the complexation of BCL with Me- $\beta$ -CD and Ac- $\beta$ -CD.                                                                                                                                 | P4 |
| <b>Figure S4.</b> Job's plot for BCL/Ac- $\beta$ -CD inclusion complex at 298.15 K and pH 6.8.                                                                                                                                                                                 | P5 |
| <b>Table S1.</b> BCL experimental solubility ( $S_2$ ) in buffer pH 6.8 with different Me- $\beta$ -CD and Ac- $\beta$ -CD concentrations ( $S_{CD}$ ) in the temperature range of 298.15 - 313.15 K.                                                                          | P6 |
| <b>Table S2.</b> Donor solution BCL concentrations (C), steady state flux (J), and permeability coefficients ( $P_{app}$ ) of BCL raw sample (BCL_raw), BCL physical mixture (BCL/Ac- $\beta$ -CD_pm) and ground complex (BCL/Ac- $\beta$ -CD_gr) with Ac- $\beta$ -CD, 37 °C. | P6 |

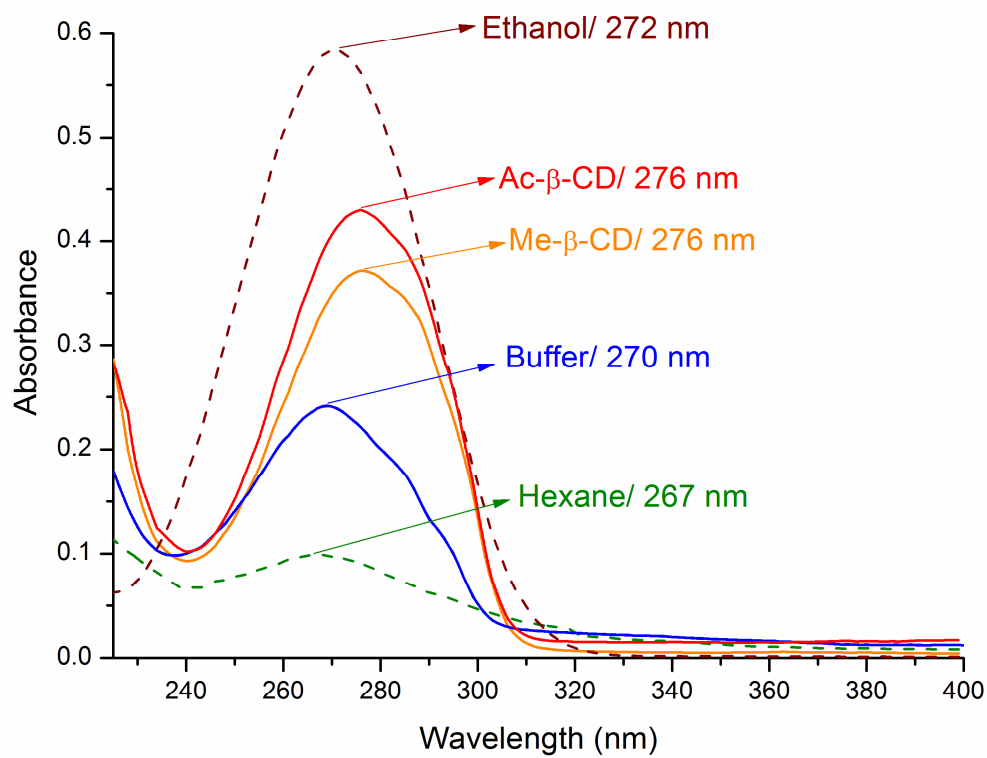

**Figure S1.** The absorption spectra of BCL in pure buffer pH 6.8 (blue), Me-β-CD (orange), Ac-β-CD (red), n-hexane (green); ethanol (wine).

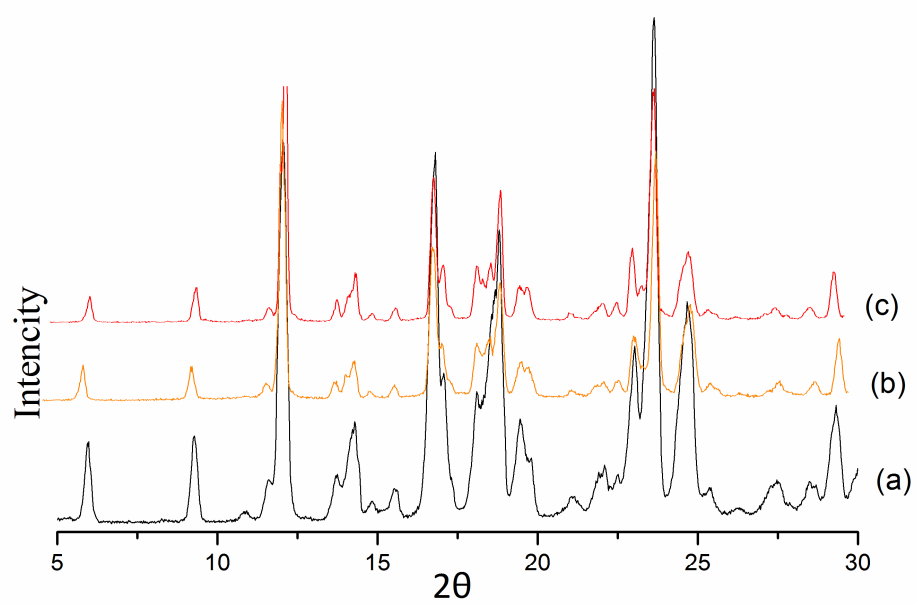

**Figure S2.** The PXRD patterns of parent BCL (a) and solid residuals after the solubility experiments with Me- $\beta$ - (b) and Ac- $\beta$ - (c) cyclodextrins.

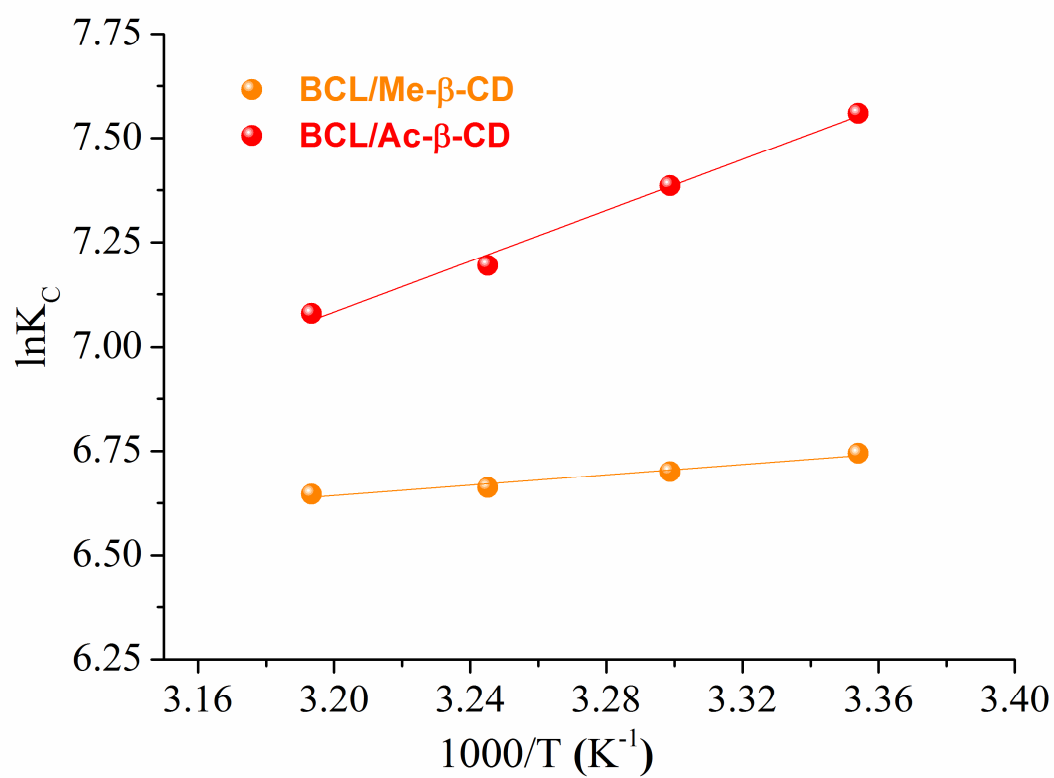

**Figure S3.** The temperature dependences of the stability constants for the complexation of BCL with Me- $\beta$ -CD and Ac- $\beta$ -CD.

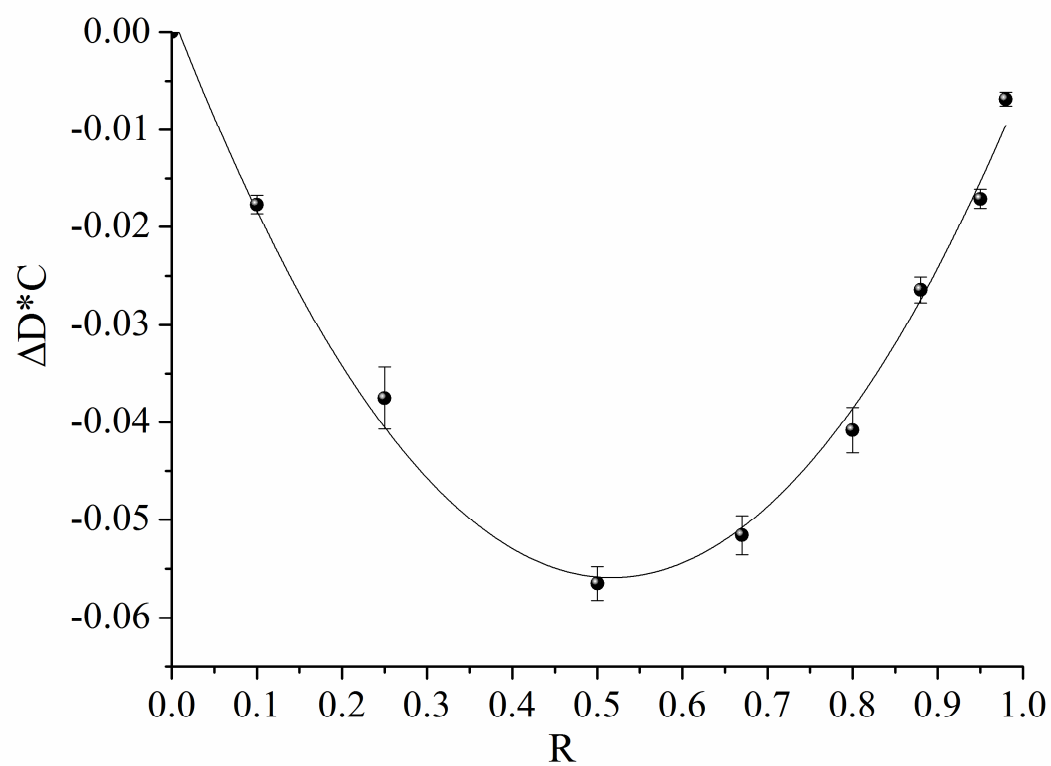

**Figure S4.** Job's plot for BCL/Ac- $\beta$ -CD inclusion complex at 298.15 K and pH 6.8.

**Table S1.** BCL experimental solubility ( $S_2$ ) in buffer pH 6.8 with different Me- $\beta$ -CD and Ac- $\beta$ -CD concentrations ( $S_{CD}$ ) in the temperature range of 298.15 - 313.15 K.

| $S_{CD}$ (M)    | $S_2 \cdot 10^5$ (M) |                  |                  |                  |
|-----------------|----------------------|------------------|------------------|------------------|
|                 | 298.15 K             | 303.15 K         | 308.15 K         | 313.15 K         |
| Me- $\beta$ -CD |                      |                  |                  |                  |
| 0               | 0.61 $\pm$ 0.02      | 0.77 $\pm$ 0.01  | 0.98 $\pm$ 0.03  | 1.23 $\pm$ 0.05  |
| 0.0025          | 2.01 $\pm$ 0.08      | 2.31 $\pm$ 0.13  | 2.80 $\pm$ 0.09  | 3.59 $\pm$ 0.11  |
| 0.005           | 3.07 $\pm$ 0.13      | 3.85 $\pm$ 0.08  | 4.77 $\pm$ 0.20  | 5.98 $\pm$ 0.19  |
| 0.01            | 5.89 $\pm$ 0.16      | 6.95 $\pm$ 0.21  | 8.48 $\pm$ 0.17  | 10.60 $\pm$ 0.21 |
| 0.015           | 8.40 $\pm$ 0.21      | 10.10 $\pm$ 0.42 | 12.4 $\pm$ 0.27  | 15.32 $\pm$ 0.29 |
| Ac- $\beta$ -CD |                      |                  |                  |                  |
| 0.0025          | 3.51 $\pm$ 0.13      | 3.85 $\pm$ 0.13  | 4.20 $\pm$ 0.11  | 4.90 $\pm$ 0.11  |
| 0.005           | 6.43 $\pm$ 0.13      | 6.90 $\pm$ 0.05  | 7.40 $\pm$ 0.22  | 8.78 $\pm$ 0.19  |
| 0.0075          | 9.36 $\pm$ 0.16      | 9.95 $\pm$ 0.11  | 10.70 $\pm$ 0.17 | 12.14 $\pm$ 0.21 |
| 0.01            | 12.20 $\pm$ 0.20     | 13.06 $\pm$ 0.23 | 13.85 $\pm$ 0.17 | 15.60 $\pm$ 0.19 |

Each solubility value represents the mean  $\pm$  SD ( $n \geq 3$ )

The standard uncertainties are  $u(T) = 0.15$  K

**Table S2.** Donor solution BCL concentrations ( $C$ ), steady state flux ( $J$ ), and permeability coefficients ( $P_{app}$ ) of BCL raw sample (BCL\_raw), BCL physical mixture (BCL/Ac- $\beta$ -CD\_pm) and ground complex (BCL/Ac- $\beta$ -CD\_gr) with Ac- $\beta$ -CD, 37 °C.

| Drug                   | $C$ (M)              | $J$ ( $\mu\text{mol} \cdot \text{cm}^{-2} \cdot \text{sec}^{-1}$ ) | $P_{app}$ ( $\text{cm} \cdot \text{s}^{-1}$ ) |
|------------------------|----------------------|--------------------------------------------------------------------|-----------------------------------------------|
| BCL_raw                | $1.05 \cdot 10^{-5}$ | $8.47 \cdot 10^{-7}$                                               | $(8.07 \pm 0.18) \cdot 10^{-5}$               |
| BCL/Ac- $\beta$ -CD_pm | $1.21 \cdot 10^{-5}$ | $9.06 \cdot 10^{-7}$                                               | $(7.49 \pm 0.24) \cdot 10^{-5}$               |
| BCL/Ac- $\beta$ -CD_gr | $1.45 \cdot 10^{-5}$ | $8.68 \cdot 10^{-7}$                                               | $(5.99 \pm 0.20) \cdot 10^{-5}$               |
